# Supplementary material for: Synchronized Regulation of Different Zwitterionic Metabolites in the Osmoadaption of Phytoplankton
Source: MDPI journal article supplement (doi:10.3390/md11062168), 2013-06-17
Supplement: s2 [file s2]

marinedrugs-11-02168-s001.mol
  corina  04151400293D 1   1.00000     0.00000 
CORINA 3.49 0023  12.04.2013
  8  7  0  0  0  0  0  0  0  0999 V2000
   -0.0225    1.8097    0.0120 C   0  0  0  0  0  0  0  0  0  0  0  0
    0.0021   -0.0041    0.0020 S   0  3  0  0  0  0  0  0  0  0  0  0
    0.9059   -0.4083    1.5220 C   0  0  0  0  0  0  0  0  0  0  0  0
    1.0141   -1.9280    1.6622 C   0  0  0  0  0  0  0  0  0  0  0  0
    1.7649   -2.2638    2.9249 C   0  0  0  0  0  0  0  0  0  0  0  0
    2.1754   -1.3704    3.6459 O   0  5  0  0  0  0  0  0  0  0  0  0
   -1.7096   -0.4377    0.4175 C   0  0  0  0  0  0  0  0  0  0  0  0
    1.9619   -3.4288    3.2255 O   0  0  0  0  0  0  0  0  0  0  0  0
  1  2  1  0      
  2  3  1  0      
  3  4  1  0      
  4  5  1  0      
  5  6  1  0      
  2  7  1  0      
  5  8  2  0      
M  CHG  2   2   1   6  -1
M  END
$$$$
