# Supplementary material for: Synchronized Regulation of Different Zwitterionic Metabolites in the Osmoadaption of Phytoplankton
Source: MDPI journal article supplement (doi:10.3390/md11062168), 2013-06-17
Supplement: s3 [file s3]

marinedrugs-11-02168-s001.mol
  ChemDraw02071408452D

  8  7  0  0  0  0  0  0  0  0999 V2000
   -1.7862    0.2062    0.0000 C   0  0  0  0  0  0  0  0  0  0  0  0
   -1.0717   -0.2062    0.0000 S   0  3  0  0  0  0  0  0  0  0  0  0
   -0.3572    0.2062    0.0000 C   0  0  0  0  0  0  0  0  0  0  0  0
    0.3572   -0.2062    0.0000 C   0  0  0  0  0  0  0  0  0  0  0  0
    1.0717    0.2062    0.0000 C   0  0  0  0  0  0  0  0  0  0  0  0
    1.7862   -0.2062    0.0000 O   0  5  0  0  0  0  0  0  0  0  0  0
   -1.0717   -1.0313    0.0000 C   0  0  0  0  0  0  0  0  0  0  0  0
    1.0717    1.0313    0.0000 O   0  0  0  0  0  0  0  0  0  0  0  0
  1  2  1  0      
  2  3  1  0      
  3  4  1  0      
  4  5  1  0      
  5  6  1  0      
  2  7  1  0      
  5  8  2  0      
M  CHG  2   2   1   6  -1
M  END
