# Supplementary material for: Synchronized Regulation of Different Zwitterionic Metabolites in the Osmoadaption of Phytoplankton
Source: MDPI journal article supplement (doi:10.3390/md11062168), 2013-06-17
Supplement: s4 [file s4]

marinedrugs-11-02168-s002.mol
  corina  04151400293D 1   1.00000     0.00000 
CORINA 3.49 0023  12.04.2013
  8  7  0  0  0  0  0  0  0  0999 V2000
   -0.1127    1.4453    0.0851 C   0  0  0  0  0  0  0  0  0  0  0  0
   -0.0050   -0.0182    0.0188 N   0  3  0  0  0  0  0  0  0  0  0  0
    0.9377   -0.4867    1.0434 C   0  0  0  0  0  0  0  0  0  0  0  0
    0.4089   -0.1365    2.4104 C   0  0  0  0  0  0  0  0  0  0  0  0
   -0.5988    0.5411    2.5190 O   0  5  0  0  0  0  0  0  0  0  0  0
    0.9888   -0.5309    3.4078 O   0  0  0  0  0  0  0  0  0  0  0  0
   -1.3248   -0.6176    0.2571 C   0  0  0  0  0  0  0  0  0  0  0  0
    0.4797   -0.4138   -1.3102 C   0  0  0  0  0  0  0  0  0  0  0  0
  1  2  1  0      
  2  3  1  0      
  3  4  1  0      
  4  5  1  0      
  4  6  2  0      
  2  7  1  0      
  2  8  1  0      
M  CHG  2   2   1   5  -1
M  END
$$$$
