# Supplementary material for: Synchronized Regulation of Different Zwitterionic Metabolites in the Osmoadaption of Phytoplankton
Source: MDPI journal article supplement (doi:10.3390/md11062168), 2013-06-17
Supplement: s6 [file s6]

marinedrugs-11-02168-s003.mol
  corina  04151400293D 1   1.00000     0.00000 
CORINA 3.49 0023  12.04.2013
  7  6  0  0  0  0  0  0  0  0999 V2000
   -0.0225    1.8097    0.0120 C   0  0  0  0  0  0  0  0  0  0  0  0
    0.0021   -0.0041    0.0020 S   0  3  0  0  0  0  0  0  0  0  0  0
    0.9059   -0.4083    1.5220 C   0  0  0  0  0  0  0  0  0  0  0  0
    2.3687   -0.0986    1.3341 C   0  0  0  0  0  0  0  0  0  0  0  0
    2.7648    0.3530    0.2731 O   0  5  0  0  0  0  0  0  0  0  0  0
    3.1560   -0.2995    2.2430 O   0  0  0  0  0  0  0  0  0  0  0  0
   -1.7096   -0.4377    0.4175 C   0  0  0  0  0  0  0  0  0  0  0  0
  1  2  1  0      
  2  3  1  0      
  3  4  1  0      
  4  5  1  0      
  4  6  2  0      
  2  7  1  0      
M  CHG  2   2   1   5  -1
M  END
$$$$
