# Supplementary material for: Synchronized Regulation of Different Zwitterionic Metabolites in the Osmoadaption of Phytoplankton
Source: MDPI journal article supplement (doi:10.3390/md11062168), 2013-06-17
Supplement: s7 [file s7]

marinedrugs-11-02168-s003.mol
  ChemDraw02071408462D

  7  6  0  0  0  0  0  0  0  0999 V2000
   -1.4289   -0.6188    0.0000 C   0  0  0  0  0  0  0  0  0  0  0  0
   -0.7145   -0.2062    0.0000 S   0  3  0  0  0  0  0  0  0  0  0  0
    0.0000   -0.6188    0.0000 C   0  0  0  0  0  0  0  0  0  0  0  0
    0.7145   -0.2062    0.0000 C   0  0  0  0  0  0  0  0  0  0  0  0
    1.4289   -0.6188    0.0000 O   0  5  0  0  0  0  0  0  0  0  0  0
    0.7145    0.6188    0.0000 O   0  0  0  0  0  0  0  0  0  0  0  0
   -0.7145    0.6188    0.0000 C   0  0  0  0  0  0  0  0  0  0  0  0
  1  2  1  0      
  2  3  1  0      
  3  4  1  0      
  4  5  1  0      
  4  6  2  0      
  2  7  1  0      
M  CHG  2   2   1   5  -1
M  END
