# Supplementary material for: Synchronized Regulation of Different Zwitterionic Metabolites in the Osmoadaption of Phytoplankton
Source: MDPI journal article supplement (doi:10.3390/md11062168), 2013-06-17
Supplement: s8 [file s8]

marinedrugs-11-02168-s004.mol
  corina  04151400293D 1   1.00000     0.00000 
CORINA 3.49 0023  12.04.2013
 11 10  0  0  0  0  0  0  0  0999 V2000
   -0.0225    1.8097    0.0120 C   0  0  0  0  0  0  0  0  0  0  0  0
    0.0021   -0.0041    0.0020 S   0  3  0  0  0  0  0  0  0  0  0  0
    0.9059   -0.4083    1.5220 C   0  0  0  0  0  0  0  0  0  0  0  0
    2.3910   -0.0938    1.3312 C   0  0  0  0  0  0  0  0  0  0  0  0
    3.1533   -0.4348    2.6133 C   0  0  0  0  0  0  0  0  0  0  0  0
    4.6530   -0.2387    2.3823 C   0  0  0  0  0  0  0  0  0  0  0  0
   -1.7096   -0.4377    0.4175 C   0  0  0  0  0  0  0  0  0  0  0  0
    2.7176    0.4240    3.6691 O   0  0  0  0  0  0  0  0  0  0  0  0
    5.4125   -0.6907    3.6029 C   0  0  0  0  0  0  0  0  0  0  0  0
    4.8101   -1.1291    4.5681 O   0  5  0  0  0  0  0  0  0  0  0  0
    6.6294   -0.6181    3.6253 O   0  0  0  0  0  0  0  0  0  0  0  0
  1  2  1  0      
  2  3  1  0      
  3  4  1  0      
  4  5  1  0      
  5  6  1  0      
  2  7  1  0      
  5  8  1  0      
  6  9  1  0      
  9 10  1  0      
  9 11  2  0      
M  CHG  2   2   1  10  -1
M  END
$$$$
