# Supplementary material for: Synchronized Regulation of Different Zwitterionic Metabolites in the Osmoadaption of Phytoplankton
Source: MDPI journal article supplement (doi:10.3390/md11062168), 2013-06-17
Supplement: s10 [file s10]

marinedrugs-11-02168-s005.mol
  corina  04151400293D 1   1.00000     0.00000 
CORINA 3.49 0023  12.04.2013
  9  8  0  0  0  0  0  0  0  0999 V2000
   -0.0178    1.4648    0.0101 C   0  0  0  0  0  0  0  0  0  0  0  0
    0.0021   -0.0041    0.0020 N   0  3  0  0  0  0  0  0  0  0  0  0
    0.7126   -0.4907    1.1921 C   0  0  0  0  0  0  0  0  0  0  0  0
   -0.0036    0.0027    2.4509 C   0  0  0  0  0  0  0  0  0  0  0  0
    0.7253   -0.4965    3.6718 C   0  0  0  0  0  0  0  0  0  0  0  0
    1.7249   -1.1833    3.5467 O   0  5  0  0  0  0  0  0  0  0  0  0
   -1.3761   -0.5125    0.0124 C   0  0  0  0  0  0  0  0  0  0  0  0
    0.3154   -0.2136    4.7847 O   0  0  0  0  0  0  0  0  0  0  0  0
    0.6897   -0.4778   -1.2066 C   0  0  0  0  0  0  0  0  0  0  0  0
  1  2  1  0      
  2  3  1  0      
  3  4  1  0      
  4  5  1  0      
  5  6  1  0      
  2  7  1  0      
  5  8  2  0      
  2  9  1  0      
M  CHG  2   2   1   6  -1
M  END
$$$$
