# Supplementary material for: Synchronized Regulation of Different Zwitterionic Metabolites in the Osmoadaption of Phytoplankton
Source: MDPI journal article supplement (doi:10.3390/md11062168), 2013-06-17
Supplement: s14 [file s14]

marinedrugs-11-02168-s007.mol
  corina  04151400303D 1   1.00000     0.00000 
CORINA 3.49 0023  12.04.2013
 10 10  0  0  0  0  0  0  0  0999 V2000
    0.0333    1.4604    0.0809 C   0  0  0  0  0  0  0  0  0  0  0  0
   -0.0236    0.0846    0.2433 C   0  0  0  0  0  0  0  0  0  0  0  0
    1.1423   -0.6593    0.1526 C   0  0  0  0  0  0  0  0  0  0  0  0
    2.3326    0.0050   -0.0991 C   0  0  0  0  0  0  0  0  0  0  0  0
    2.3153    1.3905   -0.2514 C   0  0  0  0  0  0  0  0  0  0  0  0
    1.1757    2.0656   -0.1570 N   0  3  0  0  0  0  0  0  0  0  0  0
    3.5771    2.1148   -0.5200 C   0  0  0  0  0  0  0  0  0  0  0  0
    3.5574    3.1672   -1.1415 O   0  5  0  0  0  0  0  0  0  0  0  0
    4.6394    1.6608   -0.1203 O   0  0  0  0  0  0  0  0  0  0  0  0
    1.1921    3.5212   -0.3222 C   0  0  0  0  0  0  0  0  0  0  0  0
  1  2  2  0      
  2  3  1  0      
  3  4  2  0      
  4  5  1  0      
  5  6  2  0      
  6  1  1  0      
  5  7  1  0      
  7  8  1  0      
  7  9  2  0      
  6 10  1  0      
M  CHG  2   6   1   8  -1
M  END
$$$$
