# Supplementary material for: Synchronized Regulation of Different Zwitterionic Metabolites in the Osmoadaption of Phytoplankton
Source: MDPI journal article supplement (doi:10.3390/md11062168), 2013-06-17
Supplement: s16 [file s16]

marinedrugs-11-02168-s008.mol
  corina  04151400303D 1   1.00000     0.00000 
CORINA 3.49 0023  12.04.2013
 10 10  0  0  0  0  0  0  0  0999 V2000
   -0.0158    1.3152    0.0093 N   0  3  0  0  0  0  0  0  0  0  0  0
    0.0021   -0.0041    0.0020 C   0  0  0  0  0  0  0  0  0  0  0  0
    1.1964   -0.7029   -0.0127 C   0  0  0  0  0  0  0  0  0  0  0  0
    2.3899   -0.0039   -0.0204 C   0  0  0  0  0  0  0  0  0  0  0  0
    2.3392    1.3968   -0.0129 C   0  0  0  0  0  0  0  0  0  0  0  0
    1.0925    2.0260    0.0025 C   0  0  0  0  0  0  0  0  0  0  0  0
    3.5814    2.1928   -0.0201 C   0  0  0  0  0  0  0  0  0  0  0  0
    4.6676    1.6309   -0.0327 O   0  5  0  0  0  0  0  0  0  0  0  0
    3.5250    3.4143   -0.0134 O   0  0  0  0  0  0  0  0  0  0  0  0
   -1.3060    2.0092    0.0191 C   0  0  0  0  0  0  0  0  0  0  0  0
  1  2  2  0      
  2  3  1  0      
  3  4  2  0      
  4  5  1  0      
  5  6  2  0      
  6  1  1  0      
  5  7  1  0      
  7  8  1  0      
  7  9  2  0      
  1 10  1  0      
M  CHG  2   1   1   8  -1
M  END
$$$$
