# Supplementary material for: Synchronized Regulation of Different Zwitterionic Metabolites in the Osmoadaption of Phytoplankton
Source: MDPI journal article supplement (doi:10.3390/md11062168), 2013-06-17
Supplement: s17 [file s17]

marinedrugs-11-02168-s008.mol
  ChemDraw02071408472D

 10 10  0  0  0  0  0  0  0  0999 V2000
   -1.0717    0.0000    0.0000 N   0  3  0  0  0  0  0  0  0  0  0  0
   -1.0717   -0.8250    0.0000 C   0  0  0  0  0  0  0  0  0  0  0  0
   -0.3572   -1.2375    0.0000 C   0  0  0  0  0  0  0  0  0  0  0  0
    0.3572   -0.8250    0.0000 C   0  0  0  0  0  0  0  0  0  0  0  0
    0.3572    0.0000    0.0000 C   0  0  0  0  0  0  0  0  0  0  0  0
   -0.3572    0.4125    0.0000 C   0  0  0  0  0  0  0  0  0  0  0  0
    1.0717    0.4125    0.0000 C   0  0  0  0  0  0  0  0  0  0  0  0
    1.7862    0.0000    0.0000 O   0  5  0  0  0  0  0  0  0  0  0  0
    1.0717    1.2375    0.0000 O   0  0  0  0  0  0  0  0  0  0  0  0
   -1.7862    0.4125    0.0000 C   0  0  0  0  0  0  0  0  0  0  0  0
  1  2  2  0      
  2  3  1  0      
  3  4  2  0      
  4  5  1  0      
  5  6  2  0      
  6  1  1  0      
  5  7  1  0      
  7  8  1  0      
  7  9  2  0      
  1 10  1  0      
M  CHG  2   1   1   8  -1
M  END
