# Supplementary material for: Synchronized Regulation of Different Zwitterionic Metabolites in the Osmoadaption of Phytoplankton
Source: MDPI journal article supplement (doi:10.3390/md11062168), 2013-06-17
Supplement: s18 [file s18]

marinedrugs-11-02168-s009.mol
  corina  04151400303D 1   1.00000     0.00000 
CORINA 3.49 0023  12.04.2013
 14 13  0  0  0  0  0  0  0  0999 V2000
   -0.0184    1.5028    0.0103 C   0  0  0  0  0  0  0  0  0  0  0  0
    0.0021   -0.0041    0.0020 C   0  0  0  0  0  0  0  0  0  0  0  0
    1.0661   -0.5992   -0.0113 O   0  5  0  0  0  0  0  0  0  0  0  0
   -1.0454   -0.6280    0.0087 O   0  0  0  0  0  0  0  0  0  0  0  0
    1.4170    2.0324   -0.0006 C   0  0  0  0  0  0  0  0  0  0  0  0
    1.3924    3.8462    0.0094 S   0  3  0  0  0  0  0  0  0  0  0  0
    0.8901    4.2381    1.7078 C   0  0  0  0  0  0  0  0  0  0  0  0
    1.6178    3.8252    2.4064 H   1  0  0  0  0  0  0  0  0  0  0  0
    0.8409    5.3199    1.8317 H   1  0  0  0  0  0  0  0  0  0  0  0
   -0.0902    3.8047    1.9060 H   1  0  0  0  0  0  0  0  0  0  0  0
    3.1542    4.2782   -0.0051 C   0  0  0  0  0  0  0  0  0  0  0  0
    3.6209    3.8705   -0.9018 H   1  0  0  0  0  0  0  0  0  0  0  0
    3.2623    5.3628   -0.0003 H   1  0  0  0  0  0  0  0  0  0  0  0
    3.6379    3.8610    0.8781 H   1  0  0  0  0  0  0  0  0  0  0  0
  1  2  1  0      
  2  3  1  0      
  2  4  2  0      
  1  5  1  0      
  5  6  1  0      
  6  7  1  0      
  7  8  1  0      
  7  9  1  0      
  7 10  1  0      
  6 11  1  0      
 11 12  1  0      
 11 13  1  0      
 11 14  1  0      
M  CHG  2   3  -1   6   1
M  ISO  6   8   2   9   2  10   2  12   2  13   2  14   2
M  STY  1   1 SUP
M  SLB  1   1   1
M  SAL   1  4   7   8   9  10
M  SBL   1  1   6
M  SMT   1 CD3
M  SBV   1  6   -6.4760    4.1044
M  STY  1   2 SUP
M  SLB  1   2   2
M  SAL   2  4  11  12  13  14
M  SBL   2  1  10
M  SMT   2 CD3
M  SBV   2 10   -5.7610    2.8669
M  END
$$$$
