# Supplementary material for: Synchronized Regulation of Different Zwitterionic Metabolites in the Osmoadaption of Phytoplankton
Source: MDPI journal article supplement (doi:10.3390/md11062168), 2013-06-17
Supplement: s19 [file s19]

marinedrugs-11-02168-s009.mol
  ChemDraw02071408472D

 14 13  0  0  0  0  0  0  0  0999 V2000
    0.5640   -0.2062    0.0000 C   0  0  0  0  0  0  0  0  0  0  0  0
    1.2785    0.2062    0.0000 C   0  0  0  0  0  0  0  0  0  0  0  0
    1.9930   -0.2062    0.0000 O   0  5  0  0  0  0  0  0  0  0  0  0
    1.2785    1.0313    0.0000 O   0  0  0  0  0  0  0  0  0  0  0  0
   -0.1505    0.2062    0.0000 C   0  0  0  0  0  0  0  0  0  0  0  0
   -0.8649   -0.2062    0.0000 S   0  3  0  0  0  0  0  0  0  0  0  0
   -1.5805    0.2062    0.0000 C   0  0  0  0  0  0  0  0  0  0  0  0
   -1.1680    0.9207    0.0000 H   1  0  0  0  0  0  0  0  0  0  0  0
   -0.8660   -0.2062    0.0000 H   1  0  0  0  0  0  0  0  0  0  0  0
   -1.9930   -0.5082    0.0000 H   1  0  0  0  0  0  0  0  0  0  0  0
   -0.8655   -1.0313    0.0000 C   0  0  0  0  0  0  0  0  0  0  0  0
   -1.6905   -1.0313    0.0000 H   1  0  0  0  0  0  0  0  0  0  0  0
   -0.8655   -0.2062    0.0000 H   1  0  0  0  0  0  0  0  0  0  0  0
   -0.0405   -1.0313    0.0000 H   1  0  0  0  0  0  0  0  0  0  0  0
  1  2  1  0      
  2  3  1  0      
  2  4  2  0      
  1  5  1  0      
  5  6  1  0      
  6  7  1  0      
  7  8  1  0      
  7  9  1  0      
  7 10  1  0      
  6 11  1  0      
 11 12  1  0      
 11 13  1  0      
 11 14  1  0      
M  CHG  2   3  -1   6   1
M  ISO  6   8   2   9   2  10   2  12   2  13   2  14   2
M  STY  1   1 SUP
M  SLB  1   1   1
M  SAL   1  4   7   8   9  10
M  SBL   1  1   6
M  SMT   1 CD3
M  SBV   1  6   -6.4760    4.1044
M  STY  1   2 SUP
M  SLB  1   2   2
M  SAL   2  4  11  12  13  14
M  SBL   2  1  10
M  SMT   2 CD3
M  SBV   2 10   -5.7610    2.8669
M  END
