# Supplementary material for: Synchronized Regulation of Different Zwitterionic Metabolites in the Osmoadaption of Phytoplankton
Source: MDPI journal article supplement (doi:10.3390/md11062168), 2013-06-17
Supplement: s20 [file s20]

marinedrugs-11-02168-s010.mol
  corina  04151400313D 1   1.00000     0.00000 
CORINA 3.49 0023  12.04.2013
 13 12  0  0  0  0  0  0  0  0999 V2000
   -0.0184    1.5028    0.0103 C   0  0  0  0  0  0  0  0  0  0  0  0
    0.0021   -0.0041    0.0020 C   0  0  0  0  0  0  0  0  0  0  0  0
    1.0661   -0.5992   -0.0113 O   0  5  0  0  0  0  0  0  0  0  0  0
   -1.0454   -0.6280    0.0087 O   0  0  0  0  0  0  0  0  0  0  0  0
    1.6835    2.1307   -0.0026 S   0  3  0  0  0  0  0  0  0  0  0  0
    1.4546    3.9301    0.0093 C   0  0  0  0  0  0  0  0  0  0  0  0
    0.9076    4.2209    0.9061 H   1  0  0  0  0  0  0  0  0  0  0  0
    2.4282    4.4203    0.0026 H   1  0  0  0  0  0  0  0  0  0  0  0
    0.8906    4.2305   -0.8738 H   1  0  0  0  0  0  0  0  0  0  0  0
    2.2600    1.7815    1.6816 C   0  0  0  0  0  0  0  0  0  0  0  0
    2.2107    0.7086    1.8674 H   1  0  0  0  0  0  0  0  0  0  0  0
    3.2895    2.1223    1.7911 H   1  0  0  0  0  0  0  0  0  0  0  0
    1.6261    2.3039    2.3982 H   1  0  0  0  0  0  0  0  0  0  0  0
  1  2  1  0      
  2  3  1  0      
  2  4  2  0      
  1  5  1  0      
  5  6  1  0      
  6  7  1  0      
  6  8  1  0      
  6  9  1  0      
  5 10  1  0      
 10 11  1  0      
 10 12  1  0      
 10 13  1  0      
M  CHG  2   3  -1   5   1
M  ISO  6   7   2   8   2   9   2  11   2  12   2  13   2
M  STY  1   1 SUP
M  SLB  1   1   1
M  SAL   1  4   6   7   8   9
M  SBL   1  1   5
M  SMT   1 CD3
M  SBV   1  5   -7.3626    2.8116
M  STY  1   2 SUP
M  SLB  1   2   2
M  SAL   2  4  10  11  12  13
M  SBL   2  1   9
M  SMT   2 CD3
M  SBV   2  9   -6.6490    4.0491
M  END
$$$$
