# Supplementary material for: Synchronized Regulation of Different Zwitterionic Metabolites in the Osmoadaption of Phytoplankton
Source: MDPI journal article supplement (doi:10.3390/md11062168), 2013-06-17
Supplement: s21 [file s21]

marinedrugs-11-02168-s010.mol
  ChemDraw02071408472D

 13 12  0  0  0  0  0  0  0  0999 V2000
    0.3575   -0.6740    0.0000 C   0  0  0  0  0  0  0  0  0  0  0  0
    1.0720   -0.2615    0.0000 C   0  0  0  0  0  0  0  0  0  0  0  0
    1.7864   -0.6740    0.0000 O   0  5  0  0  0  0  0  0  0  0  0  0
    1.0720    0.5635    0.0000 O   0  0  0  0  0  0  0  0  0  0  0  0
   -0.3570   -0.2615    0.0000 S   0  3  0  0  0  0  0  0  0  0  0  0
   -1.0720   -0.6740    0.0000 C   0  0  0  0  0  0  0  0  0  0  0  0
   -0.6595   -1.3885    0.0000 H   1  0  0  0  0  0  0  0  0  0  0  0
   -1.7864   -1.0865    0.0000 H   1  0  0  0  0  0  0  0  0  0  0  0
   -1.4845    0.0405    0.0000 H   1  0  0  0  0  0  0  0  0  0  0  0
   -0.3583    0.5635    0.0000 C   0  0  0  0  0  0  0  0  0  0  0  0
   -1.1833    0.5635    0.0000 H   1  0  0  0  0  0  0  0  0  0  0  0
   -0.3583    1.3885    0.0000 H   1  0  0  0  0  0  0  0  0  0  0  0
    0.4667    0.5635    0.0000 H   1  0  0  0  0  0  0  0  0  0  0  0
  1  2  1  0      
  2  3  1  0      
  2  4  2  0      
  1  5  1  0      
  5  6  1  0      
  6  7  1  0      
  6  8  1  0      
  6  9  1  0      
  5 10  1  0      
 10 11  1  0      
 10 12  1  0      
 10 13  1  0      
M  CHG  2   3  -1   5   1
M  ISO  6   7   2   8   2   9   2  11   2  12   2  13   2
M  STY  1   1 SUP
M  SLB  1   1   1
M  SAL   1  4   6   7   8   9
M  SBL   1  1   5
M  SMT   1 CD3
M  SBV   1  5   -7.3626    2.8116
M  STY  1   2 SUP
M  SLB  1   2   2
M  SAL   2  4  10  11  12  13
M  SBL   2  1   9
M  SMT   2 CD3
M  SBV   2  9   -6.6490    4.0491
M  END
