# Supplementary material for: Synchronized Regulation of Different Zwitterionic Metabolites in the Osmoadaption of Phytoplankton
Source: MDPI journal article supplement (doi:10.3390/md11062168), 2013-06-17
Supplement: s22 [file s22]

marinedrugs-11-02168-s011.mol
  corina  04151400313D 1   1.00000     0.00000 
CORINA 3.49 0023  12.04.2013
 14 13  0  0  0  0  0  0  0  0999 V2000
   -0.0225    1.8097    0.0120 C   0  0  0  0  0  0  0  0  0  0  0  0
    0.0021   -0.0041    0.0020 S   0  3  0  0  0  0  0  0  0  0  0  0
    0.9059   -0.4083    1.5220 C   0  0  0  0  0  0  0  0  0  0  0  0
    1.0141   -1.9280    1.6622 C   0  0  0  0  0  0  0  0  0  0  0  0
    1.7764   -2.2689    2.9442 C   0  0  0  0  0  0  0  0  0  0  0  0
    1.7769   -3.7851    3.1493 C   0  0  0  0  0  0  0  0  0  0  0  0
    3.1228   -1.8024    2.8362 O   0  0  0  0  0  0  0  0  0  0  0  0
    2.4198   -4.1128    4.4724 C   0  0  0  0  0  0  0  0  0  0  0  0
    2.8386   -3.2167    5.1852 O   0  5  0  0  0  0  0  0  0  0  0  0
    2.5210   -5.2740    4.8300 O   0  0  0  0  0  0  0  0  0  0  0  0
   -1.7096   -0.4377    0.4175 C   0  0  0  0  0  0  0  0  0  0  0  0
   -2.3820   -0.0237   -0.3340 H   1  0  0  0  0  0  0  0  0  0  0  0
   -1.8143   -1.5224    0.4406 H   1  0  0  0  0  0  0  0  0  0  0  0
   -1.9612   -0.0275    1.3955 H   1  0  0  0  0  0  0  0  0  0  0  0
  1  2  1  0      
  2  3  1  0      
  3  4  1  0      
  4  5  1  0      
  5  6  1  0      
  5  7  1  0      
  6  8  1  0      
  8  9  1  0      
  8 10  2  0      
  2 11  1  0      
 11 12  1  0      
 11 13  1  0      
 11 14  1  0      
M  CHG  2   2   1   9  -1
M  ISO  3  12   2  13   2  14   2
M  STY  1   1 SUP
M  SLB  1   1   1
M  SAL   1  4  11  12  13  14
M  SBL   1  1  10
M  SMT   1 CD3
M  SBV   1 10   -6.7075    2.9700
M  END
$$$$
