# Supplementary material for: Synchronized Regulation of Different Zwitterionic Metabolites in the Osmoadaption of Phytoplankton
Source: MDPI journal article supplement (doi:10.3390/md11062168), 2013-06-17
Supplement: s23 [file s23]

marinedrugs-11-02168-s011.mol
  ChemDraw02071408472D

 14 13  0  0  0  0  0  0  0  0999 V2000
   -2.4452    0.2062    0.0000 C   0  0  0  0  0  0  0  0  0  0  0  0
   -1.7308   -0.2062    0.0000 S   0  3  0  0  0  0  0  0  0  0  0  0
   -1.0163    0.2062    0.0000 C   0  0  0  0  0  0  0  0  0  0  0  0
   -0.3018   -0.2062    0.0000 C   0  0  0  0  0  0  0  0  0  0  0  0
    0.4127    0.2062    0.0000 C   0  0  0  0  0  0  0  0  0  0  0  0
    1.1271   -0.2062    0.0000 C   0  0  0  0  0  0  0  0  0  0  0  0
    0.4127    1.0313    0.0000 O   0  0  0  0  0  0  0  0  0  0  0  0
    1.8416    0.2062    0.0000 C   0  0  0  0  0  0  0  0  0  0  0  0
    2.5561   -0.2062    0.0000 O   0  5  0  0  0  0  0  0  0  0  0  0
    1.8416    1.0313    0.0000 O   0  0  0  0  0  0  0  0  0  0  0  0
   -1.7311   -1.0313    0.0000 C   0  0  0  0  0  0  0  0  0  0  0  0
   -2.5561   -1.0313    0.0000 H   1  0  0  0  0  0  0  0  0  0  0  0
   -1.7311   -0.2062    0.0000 H   1  0  0  0  0  0  0  0  0  0  0  0
   -0.9061   -1.0313    0.0000 H   1  0  0  0  0  0  0  0  0  0  0  0
  1  2  1  0      
  2  3  1  0      
  3  4  1  0      
  4  5  1  0      
  5  6  1  0      
  5  7  1  0      
  6  8  1  0      
  8  9  1  0      
  8 10  2  0      
  2 11  1  0      
 11 12  1  0      
 11 13  1  0      
 11 14  1  0      
M  CHG  2   2   1   9  -1
M  ISO  3  12   2  13   2  14   2
M  STY  1   1 SUP
M  SLB  1   1   1
M  SAL   1  4  11  12  13  14
M  SBL   1  1  10
M  SMT   1 CD3
M  SBV   1 10   -6.7075    2.9700
M  END
